# Supplementary material
Source: HighWire-hosted journal article supplement (https://qdcxjkg.com/highwire/filestream/114096/field_highwire_adjunct_files/0/CORRIGENDUM.pdf)
Supplement: CORRIGENDUM.pdf [file CORRIGENDUM.pdf]

# CORRIGENDUM

**“Do turbines with servo-controlled speed improve continuous positive airway pressure generation?” F. Lofaso, L. Heyer, A. Leroy, H. Lorino, A. Harf, D. Isabey. *Eur Respir J* 1994; 7: 2077–2081.**

The authors wish to point out that the definition of lines in figure 4 are unfortunately incorrect. The correct legend should read: . . . . : IPNOS; - - - - : MORPHEE

This is a reversal of the published version.
